# Supplementary material for: Cartilage tissue from sites of weight bearing in patients with osteoarthritis exhibits a differential phenotype with distinct chondrocytes subests
Source: PubMed Central journal article supplement — RMD Open. 2023 Oct 17;9(4):e003255. doi: 10.1136/rmdopen-2023-003255 (PMC10582868; doi:10.1136/rmdopen-2023-003255), 2023-10-17
Supplement: rmdopen-2023-003255supp003.pdf [file rmdopen-2023-003255supp003.pdf]

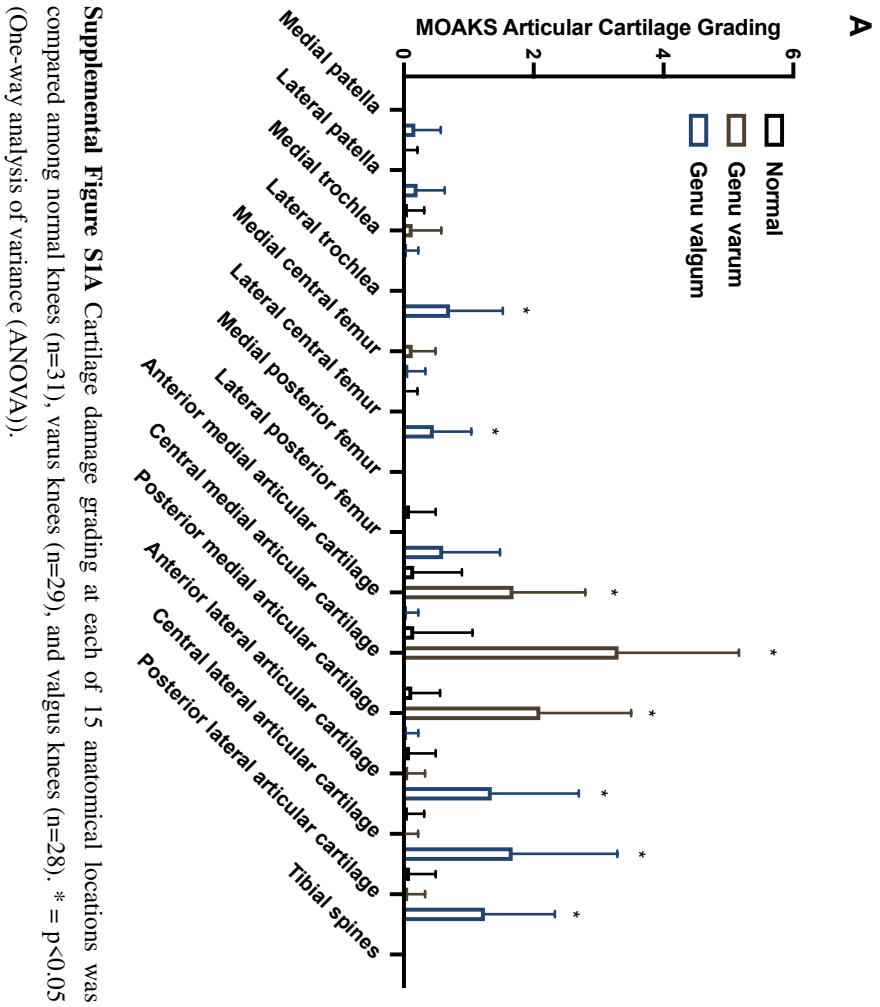

**Supplemental Figure S1A** Cartilage damage grading at each of 15 anatomical locations was compared among normal knees (n=31), varus knees (n=29), and valgus knees (n=28). \* = p < 0.05 (One-way analysis of variance (ANOVA)).
